# Supplementary material for: Catalytic enhancement in dissociation of nitric oxide over rhodium and nickel small-size clusters: a DFT study
Source: Royal Society of Chemistry journal article supplement (doi:10.1039/c3cp54667e), 2014-01-01
Supplement: c3cp54667e.pdf [file c3cp54667e.pdf]

## Supporting Information

Table S1. Calculated Activation Energies ( $E_a$ ) and Gibbs Free Energies ( $\Delta G$ ) of  $\text{NO}_{(a)} \rightarrow \text{N}_{(a)} + \text{O}_{(a)}$  on DI-Rh<sub>19</sub> and DI-Ni<sub>19</sub> Clusters in Different Temperatures (80K, 250K and 1073K), respectively.

| Reaction Paths                    | $\text{NO}_{(a)} \rightarrow \text{N}_{(a)} + \text{O}_{(a)}$ |                             |                        |                              |                         |                               |
|-----------------------------------|---------------------------------------------------------------|-----------------------------|------------------------|------------------------------|-------------------------|-------------------------------|
|                                   | $E_a(80\text{K})$ /eV                                         | $\Delta G(80\text{K})$ / eV | $E_a(250\text{K})$ /eV | $\Delta G(250\text{K})$ / eV | $E_a(1073\text{K})$ /eV | $\Delta G(1073\text{K})$ / eV |
| DI-Rh <sub>19</sub> -THB(path I)  | 0.90                                                          | -0.80                       | 0.88                   | -0.80                        | 0.85                    | -0.77                         |
| DI-Rh <sub>19</sub> -BHB(path II) | 0.24                                                          | -1.63                       | 0.24                   | -1.62                        | 0.26                    | -1.58                         |
| DI-Ni <sub>19</sub> -THB(path I)  | 1.00                                                          | -1.61                       | 1.00                   | -1.60                        | 1.02                    | -1.49                         |
| DI-Ni <sub>19</sub> -BHB(path II) | 0.41                                                          | -1.80                       | 0.40                   | -1.82                        | 0.38                    | -1.76                         |
